# Supplementary material for: Comparison of Fatty Acid Proportions Determined by Mid-Infrared Spectroscopy and Gas Chromatography in Bulk and Individual Milk Samples
Source: PubMed Central journal article supplement (PMC7341201; doi:10.3390/ani10061095), 2020-06-25
Supplement: animals-10-01095-s001.pdf [file animals-10-01095-s001.pdf]

**Table S1.** Comparison of milk fatty acids (FAs) and their groups determined by gas chromatography (GC; as reference method) and mid-infrared spectroscopy (FT-MIR; as routine method); results of regression analysis: regression equation ( $Y = A + B \times X_1$ ; where A = intercept, B = slope coefficient, SE = standard error;  $X_1$  = particular FAs determined by GC), coefficient of determination ( $R^2$ ), rank correlation (SC = Spearman coefficient), standard deviation of predicted values (SD pred.), difference between standard deviation of observed and predicted values (SD diff.).

| FAs <sup>1</sup><br>and<br>their<br>groups | Bulk samples (n = 60) |           |                |      |           |                |                |      |                 |             |             | Individual samples (n = 345) |           |                |      |           |                |                |      |                 |             |             |
|--------------------------------------------|-----------------------|-----------|----------------|------|-----------|----------------|----------------|------|-----------------|-------------|-------------|------------------------------|-----------|----------------|------|-----------|----------------|----------------|------|-----------------|-------------|-------------|
|                                            | A                     | SE<br>(A) | P-value<br>(A) | B    | SE<br>(B) | P-value<br>(B) | R <sup>2</sup> | SC   | P-value<br>(SC) | SD<br>pred. | SD<br>diff. | A                            | SE<br>(A) | P-value<br>(A) | B    | SE<br>(B) | P-value<br>(B) | R <sup>2</sup> | SC   | P-value<br>(SC) | SD<br>pred. | SD<br>diff. |
| C16:0                                      | 13.6                  | 2.71      | <0.001         | 0.69 | 0.08      | <0.001         | 0.57           | 0.67 | <0.001          | 2.08        | 0.69        | 13.9                         | 1.28      | <0.001         | 0.70 | 0.04      | <0.001         | 0.48           | 0.64 | <0.001          | 2.15        | 0.96        |
| C18:0                                      | 5.4                   | 1.50      | <0.001         | 0.83 | 0.17      | <0.001         | 0.30           | 0.35 | <0.01           | 1.62        | 0.80        | 7.5                          | 0.36      | <0.001         | 0.63 | 0.04      | <0.001         | 0.45           | 0.60 | <0.001          | 1.21        | 0.59        |
| C18:1 <sup>2</sup>                         | -12.0                 | 8.41      | 0.159          | 1.89 | 0.43      | <0.001         | 0.25           | 0.63 | <0.001          | 3.29        | 3.30        | 11.2                         | 0.76      | <0.001         | 0.91 | 0.04      | <0.001         | 0.61           | 0.72 | <0.001          | 2.96        | 0.83        |
| SFA                                        | -2.9                  | 9.39      | 0.759          | 1.09 | 0.14      | <0.001         | 0.51           | 0.70 | <0.001          | 2.93        | 1.16        | 14.8                         | 1.76      | <0.001         | 0.80 | 0.03      | <0.001         | 0.74           | 0.84 | <0.001          | 3.10        | 0.51        |
| UFA                                        | 3.3                   | 1.38      | 0.020          | 0.85 | 0.05      | <0.001         | 0.85           | 0.91 | <0.001          | 2.42        | 0.20        | 3.8                          | 0.82      | <0.001         | 0.91 | 0.03      | <0.001         | 0.75           | 0.84 | <0.001          | 3.58        | 0.55        |
| MUFA                                       | -5.4                  | 6.35      | 0.398          | 1.37 | 0.24      | <0.001         | 0.35           | 0.67 | <0.001          | 3.12        | 2.13        | 13.7                         | 0.89      | <0.001         | 0.75 | 0.03      | <0.001         | 0.57           | 0.72 | <0.001          | 2.78        | 0.89        |
| PUFA                                       | -3.0                  | 1.59      | 0.065          | 2.77 | 0.45      | <0.001         | 0.39           | 0.72 | <0.001          | 1.91        | 1.13        | 5.3                          | 0.44      | <0.001         | 0.84 | 0.13      | <0.001         | 0.11           | 0.35 | <0.001          | 0.41        | 0.82        |
| TFA                                        | 1.0                   | 0.29      | 0.002          | 0.67 | 0.13      | <0.001         | 0.33           | 0.63 | <0.001          | 0.40        | 0.30        | 2.2                          | 0.18      | <0.001         | 0.24 | 0.08      | 0.002          | 0.03           | 0.25 | <0.001          | 0.11        | 0.56        |
| SCFA                                       | 4.9                   | 1.91      | 0.013          | 0.44 | 0.16      | <0.001         | 0.11           | 0.28 | <0.05           | 0.42        | 0.85        | 5.2                          | 0.40      | <0.001         | 0.37 | 0.03      | <0.001         | 0.32           | 0.57 | <0.001          | 0.80        | 0.62        |
| MCFA                                       | 12.4                  | 10.23     | 0.232          | 0.60 | 0.20      | 0.003          | 0.14           | 0.51 | <0.001          | 2.07        | 3.49        | 23.5                         | 4.62      | <0.001         | 0.39 | 0.09      | <0.001         | 0.05           | 0.32 | <0.001          | 1.66        | 5.62        |
| LCFA                                       | 5.0                   | 6.87      | 0.467          | 0.81 | 0.19      | <0.001         | 0.24           | 0.59 | <0.001          | 2.82        | 2.90        | 6.1                          | 1.02      | <0.001         | 0.82 | 0.03      | <0.001         | 0.71           | 0.78 | <0.001          | 4.33        | 0.80        |

<sup>1</sup> SFA = saturated FAs, UFA = unsaturated FAs, MUFA = monounsaturated FAs, PUFA = polyunsaturated FAs, TFA = *trans* isomers of unsaturated FAs, SCFA = short-chain FAs, MCFA = medium-chain FAs, LCFA = long-chain FAs.

<sup>2</sup> for GC C18:1n-9 (*cis*-9).

**Table S2.** Comparison of milk fatty acids (FAs) and their groups determined by gas chromatography (GC; as reference method) and mid-infrared spectroscopy (FT-MIR; as routine method); results of regression analysis: regression equation ( $Y = B \times X_1$ ; where B = slope coefficient, SE = standard error;  $X_1$  = particular FAs determined by GC), coefficient of determination ( $R^2$ ), rank correlation (SC = Spearman coefficient), standard deviation of predicted values (SD pred.), difference between standard deviation of observed and predicted values (SD diff.).

| FAs <sup>1</sup><br>and<br>their<br>groups | Bulk samples (n = 60) |           |                |      |           |                |                |      |                 |             |             |
|--------------------------------------------|-----------------------|-----------|----------------|------|-----------|----------------|----------------|------|-----------------|-------------|-------------|
|                                            | A                     | SE<br>(A) | P-value<br>(A) | B    | SE<br>(B) | P-value<br>(B) | R <sup>2</sup> | SC   | P-value<br>(SC) | SD<br>pred. | SD<br>diff. |
| C18:1 <sup>2</sup>                         | -                     | -         | ns             | 1.28 | 0.04      | <0.001         | 0.949          | 0.63 | <0.001          | 2.23        | 4.37        |
| SFA                                        | -                     | -         | ns             | 1.05 | 0.01      | <0.001         | 0.998          | 0.70 | <0.001          | 2.81        | 1.27        |
| MUFA                                       | -                     | -         | ns             | 1.16 | 0.02      | <0.001         | 0.981          | 0.67 | <0.001          | 2.65        | 2.60        |
| PUFA                                       | -                     | -         | ns             | 1.94 | 0.09      | <0.001         | 0.889          | 0.72 | <0.001          | 1.33        | 1.70        |
| MCFA                                       | -                     | -         | ns             | 0.84 | 0.01      | <0.001         | 0.986          | 0.51 | <0.001          | 2.89        | 2.67        |
| LCFA                                       | -                     | -         | ns             | 0.95 | 0.02      | <0.001         | 0.980          | 0.59 | <0.001          | 3.30        | 2.42        |

<sup>1</sup> SFA = saturated FAs, MUFA = monounsaturated FAs, PUFA = polyunsaturated FAs, MCFA = medium-chain FAs, LCFA = long-chain FAs.

<sup>2</sup> for GC C18:1n-9 (*cis*-9).
